# Supplementary material for: Natural variation in herbivore-induced volatiles in Arabidopsis thaliana
Source: PubMed Central journal article supplement — J Exp Bot. 2010 May 20;61(11):3041–56. doi: 10.1093/jxb/erq127 (PMC2892144; doi:10.1093/jxb/erq127), 2010-05-20
Supplement: erq127_1.pdf [file erq127_1.pdf]

# Natural Variation in Herbivore-Induced Volatiles in

## *Arabidopsis thaliana*

Tjeerd A.L. Snoeren, Iris F. Kappers, Colette Broekgaarden, Roland Mumm,

Marcel Dicke and Harro J. Bouwmeester

### Supplementary material

**Table S1.** Characteristics of the identified induced volatile compounds in headspace of *Arabidopsis thaliana* leaves after *Pieris rapae* herbivory or jasmonic acid treatment.

| Compound                    | Retention index | <i>m/z</i> fragment used for quantification |
|-----------------------------|-----------------|---------------------------------------------|
| pentan-2-ol                 | 732             | 45                                          |
| 2-heptene                   | 735             | 55                                          |
| ( <i>E</i> )-3-penten-2-one | 735             | 69                                          |
| 2-pentenal                  | 758             | 55                                          |
| 1-pentanol                  | 767             | 42                                          |
| ( <i>E</i> )-3-hexenal      | 770             | 41                                          |
| ( <i>Z</i> )-2-penten-1-ol  | 771             | 57                                          |
| ( <i>E</i> )-3-penten-2-ol  | 774             | 71                                          |
| ( <i>Z</i> )-3-hexenal      | 796             | 41                                          |
| hexan-2-ol                  | 801             | 45                                          |
| ( <i>E</i> )-3-hexen-1-ol   | 851             | 41                                          |
| ( <i>E</i> )-2-hexenal      | 853             | 41                                          |
| ( <i>Z</i> )-3-hexen-1-ol   | 853             | 67                                          |
| hexanol                     | 868             | 56                                          |
| hexanal                     | 878             | 44                                          |

|                                |      |     |
|--------------------------------|------|-----|
| 1-nonene                       | 892  | 56  |
| 4-methyl-3-penten-2-one        | 892  | 83  |
| heptanal                       | 900  | 70  |
| heptan-2-ol                    | 908  | 45  |
| ( <i>E,E</i> )-2,4-hexadienal, | 910  | 81  |
| $\alpha$ -pinene               | 939  | 93  |
| 1-octen-3-ol                   | 943  | 57  |
| benzaldehyde                   | 965  | 77  |
| trans pinane                   | 974  | 55  |
| 1-octen-1-ol                   | 977  | 57  |
| 6-methyl-5-hepten-2-one        | 989  | 69  |
| $\beta$ -myrcene               | 995  | 93  |
| octanal                        | 1000 | 43  |
| ( <i>E</i> )-hexenyl acetate   | 1006 | 43  |
| $\alpha$ -phellandrene         | 1007 | 93  |
| ( <i>Z</i> )-3-hexenyl acetate | 1010 | 43  |
| 3-carene                       | 1010 | 93  |
| $\alpha$ -terpinene            | 1017 | 93  |
| limonene                       | 1033 | 93  |
| ( <i>Z</i> )- $\beta$ -ocimene | 1040 | 93  |
| ( <i>E</i> )- $\beta$ -ocimene | 1052 | 93  |
| $\gamma$ -terpinene            | 1062 | 93  |
| acetophenone                   | 1068 | 105 |
| hexanoic acid                  | 1085 | 60  |
| terpinolene                    | 1093 | 93  |
| linalool                       | 1099 | 93  |
| nonanal                        | 1109 | 57  |
| DMNT <sup>1</sup>              | 1114 | 69  |
| allo-ocimene                   | 1129 | 69  |

|                                      |      |            |
|--------------------------------------|------|------------|
| $\beta$ -sesquiphellandrene          | 1149 | 69         |
| $\alpha$ -terpineol                  | 1186 | 59         |
| MeSA <sup>3</sup>                    | 1193 | 92+120+150 |
| verbenone                            | 1204 | 107        |
| decanal                              | 1207 | 57         |
| nerol                                | 1225 | 69         |
| $\beta$ -citral                      | 1239 | 69         |
| pulegone                             | 1240 | 81         |
| ethylsalicylate                      | 1248 | 120        |
| geraniol                             | 1255 | 69         |
| indole                               | 1292 | 117        |
| $\alpha$ -copaene                    | 1378 | 161        |
| $\beta$ -elemene                     | 1379 | 81         |
| ( <i>E</i> )- $\beta$ -caryophyllene | 1420 | 93         |
| thujopsene                           | 1431 | 119        |
| geranyl acetone                      | 1454 | 69         |
| $\alpha$ -himachalene                | 1454 | 93         |
| $\alpha$ -humulene                   | 1454 | 107        |
| ( <i>E</i> )- $\beta$ -farnesene     | 1464 | 69         |
| $\beta$ -acoradiene                  | 1464 | 119        |
| $\beta$ -chamigrene                  | 1484 | 189        |
| $\beta$ -ionone                      | 1486 | 121        |
| cuparene                             | 1506 | 132        |
| ( <i>E,E</i> )- $\alpha$ -farnesene  | 1509 | 93         |
| $\beta$ -bisabolene                  | 1510 | 69         |
| ( <i>Z</i> )-nerolidol               | 1535 | 69         |
| geranylisovalerate                   | 1553 | 85         |
| ( <i>E</i> )-nerolidol               | 1564 | 69         |

|                   |      |    |
|-------------------|------|----|
| TMTT <sup>2</sup> | 1590 | 69 |
|-------------------|------|----|

<sup>1</sup>, (*E*)-4,8-dimethyl-1,3,7-nonatriene

<sup>2</sup>, (*E,E*)-4,8,12-trimethyltrideca-1,3,7,11-tetraene

<sup>3</sup>, methyl salicylate

**Table S2.** Sequences of *Arabidopsis thaliana*-derived primers used in quantitative Real Time-PCR analyses.

| <i>Gene</i>     | <i>AGI-codes</i> | <i>Forward primer (5' → 3')</i> | <i>Reverse primer (5' → 3')</i> |
|-----------------|------------------|---------------------------------|---------------------------------|
| <i>β-Actin</i>  | At3g46520        | GGAGAAGATTTGGCATCACAC           | TGGCAACATACATAGCAGGAG           |
| <i>HPL1</i>     | At4g15440        | ACATCGCTGAGAACGGTTG             | CAAGAGGCTGAGGAACTACG            |
| <i>BSMT1</i>    | At3g11480        | TGGTCACTACTACGAAGAAGATG         | GAGCATTGGTTCACTAACAGC           |
| <i>TPS03</i>    | At4g16740        | GCCACCATCCTCCGTCTC              | CCAAGCCACACCGATAATTCC           |
| <i>TPS04</i>    | At1g61120        | TCGCAGCACACACCATTG              | GAGCAGCACGGAGTTCATC             |
| <i>CYP72A13</i> | At3g14660        | GATGGCAATGACACTGATTCTAC         | GATAAGAGGAGCACCGAACTG           |
| <i>CYP82G1</i>  | At3g25180        | ATCAGACAGCACATCCATCAC           | GCCGACACTATTATCAATCTCTTC        |

**Table S3.** Results of one-way ANOVA for each compound on differences between JA and *Pieris rapae* treatment. For each accession the volatile compounds that are emitted in significantly different (ANOVA) rates between both treatments ((*Pieris rapae* infestation (Pr) and JA-treatment (JA)). F- and P-values (Sig.) are given.

| <b>An-1</b>                 | <b>Treatment with higher average emission rate:</b> |    | <b>F</b> | <b>Sig.</b> |
|-----------------------------|-----------------------------------------------------|----|----------|-------------|
| (E)-2-hexenal               | Pr                                                  |    | 9.170    | 0.016       |
| trans pinane                | Pr                                                  |    | 9.305    | 0.016       |
| $\beta$ -myrcene            |                                                     | JA | 11.714   | 0.009       |
| $\alpha$ -terpineol         | Pr                                                  |    | 9.712    | 0.014       |
| $\beta$ -acoradiene         | Pr                                                  |    | 11.409   | 0.010       |
| (E)-nerolidol               |                                                     | JA | 9.207    | 0.016       |
| TMTT <sup>1</sup>           |                                                     | JA | 5.632    | 0.045       |
| <b>Col-0</b>                |                                                     |    |          |             |
| <b>Col-0</b>                | <b>Treatment with higher average emission rate:</b> |    | <b>F</b> | <b>Sig.</b> |
| DMNT <sup>2</sup>           | Pr                                                  |    | 10.059   | 0.010       |
| MeSA <sup>3</sup>           | Pr                                                  |    | 102.577  | 0.000       |
| <b>C-24</b>                 |                                                     |    |          |             |
| <b>C-24</b>                 | <b>Treatment with higher average emission rate:</b> |    | <b>F</b> | <b>Sig.</b> |
| pentan-2-ol                 |                                                     | JA | 15.933   | 0.004       |
| (E)-2-hexenal               | Pr                                                  |    | 52.706   | 0.000       |
| 4-Me-3-penten-2-one         |                                                     | JA | 17.129   | 0.003       |
| benzaldehyde                |                                                     | JA | 8.315    | 0.020       |
| (E)- $\beta$ -ocimene       |                                                     | JA | 7.592    | 0.025       |
| $\beta$ -sesquiphellandrene |                                                     | JA | 6.925    | 0.030       |
| $\alpha$ -terpineol         |                                                     | JA | 14.910   | 0.005       |

|                     |                                                     |    |          |             |
|---------------------|-----------------------------------------------------|----|----------|-------------|
| MeSA <sup>3</sup>   | Pr                                                  |    | 10.119   | 0.013       |
| nerol               |                                                     | JA | 50.385   | 0.000       |
| ethylsalicylate     | Pr                                                  |    | 12.938   | 0.007       |
| indole              |                                                     | JA | 448.516  | 0.000       |
| β-elemene           |                                                     | JA | 6.791    | 0.031       |
| β-farnesene         |                                                     | JA | 57.984   | 0.000       |
| (E)-nerolidol       |                                                     | JA | 10.805   | 0.011       |
| <b>Cvi</b>          |                                                     |    |          |             |
|                     | <b>Treatment with higher average emission rate:</b> |    | <b>F</b> | <b>Sig.</b> |
| (E)-3-hexenal       | Pr                                                  |    | 14.663   | 0.005       |
| (Z)-2-penten-1-ol   |                                                     | JA | 6.614    | 0.033       |
| (Z)-3-hexenal       | Pr                                                  |    | 7.115    | 0.028       |
| (E)-2-hexenal       | Pr                                                  |    | 7.892    | 0.023       |
| trans pinane        | Pr                                                  |    | 5.357    | 0.049       |
| α-phellandrene      | Pr                                                  |    | 21.808   | 0.002       |
| (Z)-hexenyl acetate | Pr                                                  |    | 10.514   | 0.012       |
| 3-carene            |                                                     | JA | 13.407   | 0.006       |
| limonene            | Pr                                                  |    | 28.407   | 0.001       |
| (Z)-β-ocimene       |                                                     | JA | 8.471    | 0.020       |
| acetophenone        |                                                     | JA | 9.238    | 0.016       |
| MeSA <sup>3</sup>   | Pr                                                  |    | 24.951   | 0.001       |
| β-farnesene         | Pr                                                  |    | 6.445    | 0.035       |
| (E)-nerolidol       |                                                     | JA | 7.072    | 0.029       |
| <b>Eri-1</b>        |                                                     |    |          |             |
|                     | <b>Treatment with higher average emission rate:</b> |    | <b>F</b> | <b>Sig.</b> |
| 2-pentanal          | Pr                                                  |    | 18.740   | 0.003       |
| (E)-2-hexenal       |                                                     | JA | 14.719   | 0.005       |

|                       |                                                     |    |          |             |
|-----------------------|-----------------------------------------------------|----|----------|-------------|
| (Z)-3-hexen-1-ol      | Pr                                                  |    | 5.484    | 0.047       |
| 1-octen-1-ol          | Pr                                                  |    | 7.716    | 0.024       |
| $\beta$ -myrcene      |                                                     | JA | 10.475   | 0.012       |
| linalool              | Pr                                                  |    | 8.715    | 0.018       |
| MeSA <sup>3</sup>     | Pr                                                  |    | 61.541   | 0.000       |
| nerol                 | Pr                                                  |    | 6.343    | 0.036       |
| $\alpha$ -farnesene   |                                                     | JA | 30.832   | 0.001       |
| $\beta$ -bisbolene    |                                                     | JA | 7.450    | 0.026       |
| <b>Kond</b>           |                                                     |    |          |             |
|                       | <b>Treatment with higher average emission rate:</b> |    | <b>F</b> | <b>Sig.</b> |
| (Z)-3-hexen-1-ol      | Pr                                                  |    | 17.445   | 0.003       |
| hexanol               | Pr                                                  |    | 5.420    | 0.048       |
| $\beta$ -myrcene      |                                                     | JA | 32.530   | 0.000       |
| (Z)- $\beta$ -ocimene |                                                     | JA | 6.367    | 0.036       |
| verbenone             |                                                     | JA | 6.500    | 0.034       |
| decanal               |                                                     | JA | 17.427   | 0.003       |
| (Z)-nerolidol         |                                                     | JA | 10.927   | 0.011       |
| <b>Kyo-1</b>          |                                                     |    |          |             |
|                       | <b>Treatment with higher average emission rate:</b> |    | <b>F</b> | <b>Sig.</b> |
| (Z)-nerolidol         |                                                     | JA | 15.012   | 0.005       |
| <b>Ler</b>            |                                                     |    |          |             |
|                       | <b>Treatment with higher average emission rate:</b> |    | <b>F</b> | <b>Sig.</b> |
| $\beta$ -myrcene      | Pr                                                  |    | 9.877    | 0.014       |
| (E)-hexenyl acetate   | Pr                                                  |    | 19.068   | 0.002       |
| (Z)- $\beta$ -ocimene | Pr                                                  |    | 8.886    | 0.018       |



|                               |                                                     |    |          |             |
|-------------------------------|-----------------------------------------------------|----|----------|-------------|
| hexanoic acid                 | Pr                                                  |    | 5.999    | 0.040       |
| ethylsalicylate               |                                                     | JA | 6.290    | 0.036       |
| <b>WS</b>                     |                                                     |    |          |             |
|                               | <b>Treatment with higher average emission rate:</b> |    | <b>F</b> | <b>Sig.</b> |
| ( <i>E,E</i> )-2,4-hexadienal |                                                     | JA | 12.120   | 0.006       |
| ( <i>Z</i> )-hexenyl acetate  |                                                     | JA | 5.309    | 0.044       |
| linalool                      |                                                     | JA | 5.361    | 0.043       |
| geranyl acetone               |                                                     | JA | 6.643    | 0.028       |
| $\alpha$ -farnesene           |                                                     | JA | 5.447    | 0.042       |

<sup>1</sup>, (*E,E*)-4,8,12-trimethyltrideca-1,3,7,11-tetraene

<sup>2</sup>, (*E*)-4,8-dimethyl-1,3,7-nonatriene

<sup>3</sup>, methyl salicylate

**Table S4.** Volatile compounds that are emitted in significantly different rates among nine accessions of *Arabidopsis thaliana* treated with JA, infested with 20 first instar larvae of *Pieris rapae* or left untreated (control). Individual volatiles were analyzed for significant differences between accessions within one treatment, by using one-way ANOVA followed by a Dunnett T3 post-hoc analysis. Significance: \*  $P < 0.05$ ; \*\*  $P < 0.01$ ; \*\*\*  $P < 0.001$ .

| Compound                   | Control              | Sign.             | <i>P. rapae</i>   | Sign. | JA | Sign. |  |
|----------------------------|----------------------|-------------------|-------------------|-------|----|-------|--|
| <b>(E)-2-hexenal</b>       |                      |                   | An-1 > <i>Ler</i> | *     |    |       |  |
|                            |                      |                   | C-24 > <i>Ler</i> | *     |    |       |  |
| <b>(E)-3-hexenal</b>       | WS > Col-0           | **                |                   |       |    |       |  |
|                            | WS > C-24            | *                 |                   |       |    |       |  |
| <b>(Z)-hexenyl acetate</b> |                      |                   | Cvi > An-1        | ***   |    |       |  |
|                            |                      |                   | Cvi > C-24        | ***   |    |       |  |
| <b>(Z)-2-penten-1-ol</b>   | WS > Col-0           | *                 |                   |       |    |       |  |
| <b>3-hexen-1-ol</b>        |                      |                   | An-1 > Col-0      | ***   |    |       |  |
|                            |                      |                   | An-1 > Cvi        | *     |    |       |  |
|                            |                      |                   | Cvi > Col-0       | *     |    |       |  |
|                            |                      |                   | Eri-1 > Col-0     | **    |    |       |  |
|                            |                      |                   | Kond > C-24       | *     |    |       |  |
|                            |                      |                   | Kond > Col-0      | ***   |    |       |  |
|                            |                      |                   | Kond > Cvi        | **    |    |       |  |
|                            |                      |                   | WS > Col-0        | ***   |    |       |  |
|                            |                      |                   | WS > Cvi          | *     |    |       |  |
|                            | <b>hexanoic acid</b> | C-24 > <i>Ler</i> | ***               |       |    |       |  |
|                            | <b>pentan-2-ol</b>   | C-24 > Kyo-1      | *                 |       |    |       |  |
|                            |                      | Cvi > Kyo-1       | *                 |       |    |       |  |
| <b>(E)-nerolidol</b>       | C-24 > Col-0         | *                 | Col-0 > WS        | *     |    |       |  |
|                            |                      |                   | Kond > WS         | *     |    |       |  |

|                                       |              |     |              |     |               |     |
|---------------------------------------|--------------|-----|--------------|-----|---------------|-----|
| <b>(E)-<math>\beta</math>-ocimene</b> |              |     | Kond > C-24  | *** | An-1 > Col-0  | *   |
|                                       |              |     | Kond > Col-0 | **  | An-1 > Kyo-1  | **  |
|                                       |              |     | WS > Col-0   | *   | C-24 > Kyo-1  | *   |
|                                       |              |     | WS > C-24    | **  | Cvi > Kyo-1   | *   |
|                                       |              |     |              |     | Eri-1 > Kyo-1 | *   |
|                                       |              |     |              |     | Kond > Col-0  | *** |
|                                       |              |     |              |     | Kond > Cvi    | *   |
|                                       |              |     |              |     | Kond > Eri-1  | *** |
|                                       |              |     |              |     | Kond > Kyo-1  | *** |
|                                       |              |     |              |     | WS > Col-0    | *** |
|                                       |              |     |              |     | WS > Eri-1    | **  |
|                                       |              |     |              |     | WS > Kyo-1    | *** |
| <b>(Z)-<math>\beta</math>-ocimene</b> | Kond > An-1  | **  | An-1 > Col-0 | *   | An-1 > Kyo-1  | *   |
|                                       | Kond > Cvi   | *   | Kond > Col-0 | *   | C-24 > Col-0  | *   |
|                                       |              |     | Ler > C-24   | *   | C-24 > Kyo-1  | *   |
|                                       |              |     | Ler > Col-0  | **  | Cvi > Col-0   | *   |
|                                       |              |     | WS > Col-0   | *   | Cvi > Kyo-1   | **  |
|                                       |              |     | WS > C-24    | *   | Kond > Col-0  | **  |
|                                       |              |     |              |     | Kond > Eri-1  | *   |
|                                       |              |     |              |     | Kond > Kyo-1  | *** |
|                                       |              |     |              |     | Kond > Ler    | *   |
|                                       |              |     |              |     | WS > Col-0    | *   |
|                                       |              |     |              |     | WS > Kyo-1    | **  |
| <b>3-carene</b>                       | An-1 > Col-0 | *** |              |     |               |     |

|                             |                    |     |                   |     |                    |     |
|-----------------------------|--------------------|-----|-------------------|-----|--------------------|-----|
| <b>β -acoradiene</b>        |                    |     | Cvi > Kyo-1       | *   |                    |     |
| <b>DMNT</b>                 | C-24 > Col-0       | *** |                   |     | C-24 > Col-0       | **  |
|                             | Kond > Col-0       | *** |                   |     | Kond > Col-0       | *   |
|                             | WS > Col-0         | **  |                   |     | WS > Col-0         | *** |
| <b>β-bisabolene</b>         |                    |     | An-1 > Kond       | *** | C-24 > WS          | *   |
|                             |                    |     | C-24 > Kond       | *** | Eri-1 > WS         | *   |
|                             |                    |     | Kyo-1 > Kond      | *** |                    |     |
| <b>β-farnesene</b>          | Col-0 > <i>Ler</i> | **  | Col-0 > C-24      | *** |                    |     |
|                             | Kond > <i>Ler</i>  | *   | Cvi > C-24        | *   |                    |     |
|                             |                    |     | Cvi > C-24        | *   |                    |     |
|                             |                    |     | Kond > C-24       | **  |                    |     |
|                             |                    |     | Kyo-1 > C-24      | *** |                    |     |
|                             |                    |     | WS > C-24         | *   |                    |     |
| <b>β-myrcene</b>            |                    |     | Cvi > An-1        | *   | Cvi > An-1         | *   |
|                             |                    |     | Eri-1 > An-1      | *   | Cvi > Col-0        | *   |
|                             |                    |     | Kond > An-1       | *   | Cvi > <i>Ler</i>   | *   |
|                             |                    |     | <i>Ler</i> > An-1 | *   | Eri-1 > Col-0      | *   |
| <b>β-myrcene</b>            |                    |     |                   |     | Eri-1 > <i>Ler</i> | *   |
|                             |                    |     |                   |     | Kond > An-1        | *** |
|                             |                    |     |                   |     | Kond > C-24        | **  |
|                             |                    |     |                   |     | Kond > Col-0       | *** |
|                             |                    |     |                   |     | Kond > <i>Ler</i>  | **  |
|                             |                    |     |                   |     | Kond > WS          | *   |
| <b>β-sesquiphellandrene</b> |                    |     | An-1 > Eri-1      | *   | An-1 > Cvi         | *   |
|                             |                    |     | An-1 > Col-0      | *   | An-1 > Eri-1       | *   |

|                                         |              |   |               |     |              |     |
|-----------------------------------------|--------------|---|---------------|-----|--------------|-----|
|                                         |              |   |               |     |              |     |
|                                         |              |   | An-1 > C-24   | *   | Kond > Cvi   | *   |
|                                         |              |   |               |     | Kond > Eri-1 | *   |
| <b>TMTT</b>                             |              |   | Col-0 > C-24  | **  | An-1 > Cvi   | *   |
|                                         |              |   | Col-0 > Cvi   | **  | Kond > Cvi   | **  |
|                                         |              |   | Kond > C-24   | *   | Kyo-1 > Cvi  | *** |
|                                         |              |   | Kond > Cvi    | *   | Ler > Cvi    | **  |
|                                         |              |   | WS > Cvi      | **  |              |     |
|                                         |              |   | WS > C-24     | *   |              |     |
| <b><math>\alpha</math>-farnesene</b>    |              |   | An-1 > Cvi    | **  | Eri-1 > C-24 | **  |
|                                         |              |   | An-1 > Col-0  | *   | Eri-1 > WS   | **  |
|                                         |              |   | An-1 > C-24   | *   | Kond > C-24  | *   |
|                                         |              |   | Eri-1 > Cvi   | **  |              |     |
|                                         |              |   | Kyo-1 > C-24  | *   |              |     |
|                                         |              |   | Kyo-1 > Col-0 | *   |              |     |
|                                         |              |   | Kyo-1 > Cvi   | *** |              |     |
|                                         |              |   | Kyo-1 > Ler   | *   |              |     |
| <b><math>\alpha</math>-humulene</b>     |              |   | C-24 > Kyo-1  | **  |              |     |
| <b><math>\alpha</math>-phellandrene</b> | Cvi > Col-0  | * |               |     |              |     |
|                                         | Kond > Col-0 | * |               |     |              |     |
| <b><math>\alpha</math>-pinene</b>       |              |   |               |     | Kond > An-1  | *   |
|                                         |              |   |               |     | Ler > An-1   | *   |
| <b>benzaldehyde</b>                     |              |   | An-1 > C-24   | **  |              |     |
|                                         |              |   | Col-0 > C-24  | *   |              |     |
|                                         |              |   | Kond > C-24   | *   |              |     |

|                        |            |    |                   |     |                    |     |
|------------------------|------------|----|-------------------|-----|--------------------|-----|
|                        |            |    | <i>Ler</i> > C-24 | **  |                    |     |
| <b>decanal</b>         |            |    | Col-0 > An-1      | *   |                    |     |
|                        |            |    | Col-0 > Cvi       | *   |                    |     |
|                        |            |    | Eri-1 > An-1      | *   |                    |     |
|                        |            |    | Eri-1 > Cvi       | *   |                    |     |
|                        |            |    | WS > An-1         | *** |                    |     |
|                        |            |    | WS > Cvi          | **  |                    |     |
| <b>ethylsalicylate</b> |            |    |                   |     | Cvi > An-1         | *** |
|                        |            |    |                   |     | Cvi > Eri-1        | *** |
|                        |            |    |                   |     | <i>Ler</i> > An-1  | *** |
|                        |            |    |                   |     | <i>Ler</i> > Eri-1 | *** |
| <b>geranyl acetone</b> |            |    | Kond > Col-0      | *   | WS > Eri-1         | *   |
| <b>indole</b>          |            |    | Cvi > C-24        | *** |                    |     |
| <b>MeSA</b>            | An-1 > WS  | *  | An-1 > Eri-1      | *   | Col-0 > Cvi        | *** |
|                        | Eri-1 > WS | *  | An-1 > Kond       | **  | Col-0 > Eri-1      | *   |
|                        | Kyo-1 > WS | ** | An-1 > Kyo-1      | *   | Kond > Cvi         | **  |
|                        |            |    | An-1 > Cvi        | *** | Kyo-1 > Cvi        | **  |
|                        |            |    | C-24 > Cvi        | *** | <i>Ler</i> > Cvi   | *** |
|                        |            |    | Col-0 > Cvi       | *** | <i>Ler</i> > Eri-1 | **  |
|                        |            |    | Col-0 > Eri-1     | *   | <i>Ler</i> > Kond  | *   |
|                        |            |    | Col-0 > Kond      | **  | <i>Ler</i> > Kyo-1 | *   |
|                        |            |    | Col-0 > Kyo-1     | *   | WS > Cvi           | *** |
|                        |            |    | Eri-1 > C-24      | *** | Ws > Eri-1         | **  |
|                        |            |    | Kyo-1 > Cvi       | **  |                    |     |
|                        |            |    | <i>Ler</i> > Cvi  | *** |                    |     |

|  |  |  |                   |     |  |  |
|--|--|--|-------------------|-----|--|--|
|  |  |  | <i>Ler</i> > Kond | *   |  |  |
|  |  |  | WS > Cvi          | *** |  |  |

**Table S5.** Significant differences in headspace among accessions after either treatment or left non-treated. One-way ANOVA followed by Dunnett T3 results for 9 *Arabidopsis thaliana* accessions for each volatile compound.

| <i>Pieris rapae</i> |         |                             |                                       |            |        |
|---------------------|---------|-----------------------------|---------------------------------------|------------|--------|
| Geno I              | >Geno J | Compound                    | Mean <sup>1</sup> Difference<br>(I-J) | Std. Error | Sign.  |
| An-1                | > Col-0 | 3-hexen-1ol                 | 1.945                                 | 0.120      | <0.001 |
|                     |         | (Z)- $\beta$ -ocimene       | 0.789                                 | 0.183      | 0.045  |
|                     |         | $\beta$ -sesquiphellandrene | 1.149                                 | 0.256      | 0.042  |
|                     |         | $\alpha$ -farnesene         | 1.116                                 | 0.243      | 0.038  |
|                     | > C24   | benzaldehyde                | 1.448                                 | 0.226      | 0.006  |
|                     |         | $\beta$ -sesquiphellandrene | 1.262                                 | 0.285      | 0.047  |
|                     |         | $\alpha$ -farnesene         | 1.314                                 | 0.297      | 0.049  |
|                     | > Cvi   | 3-hexen-1ol                 | 0.900                                 | 0.174      | 0.024  |
|                     |         | MeSA                        | 1.704                                 | 0.128      | <0.001 |
|                     |         | $\alpha$ -farnesene         | 1.724                                 | 0.225      | 0.003  |
|                     | > Eri-1 | $\beta$ -sesquiphellandrene | 1.280                                 | 0.240      | 0.022  |
|                     |         | MeSA                        | 0.524                                 | 0.103      | 0.026  |
|                     | > Kond  | MeSA                        | 1.152                                 | 0.149      | 0.002  |
|                     |         | $\beta$ -bisbolene          | 7.448                                 | 0.226      | <0.001 |
|                     | > Kyo-1 | MeSA                        | 0.808                                 | 0.140      | 0.012  |
|                     | > Ler   | (E)-2-hexenal               | 7.080                                 | 1.226      | 0.045  |
| Col-0               | > An-1  | decanal                     | 1.352                                 | 0.256      | 0.027  |
|                     | > Cvi   | MeSA                        | 1.602                                 | 0.106      | <0.001 |
|                     |         | decanal                     | 1.145                                 | 0.285      | 0.019  |
|                     | > Eri-1 | MeSA                        | 0.422                                 | 0.074      | 0.013  |
|                     | > C24   | benzaldehyde                | 1.155                                 | 0.192      | 0.024  |



|       |              |                                |       |       |        |
|-------|--------------|--------------------------------|-------|-------|--------|
|       |              | $\beta$ -farnesene             | 1.043 | 0.067 | <0.001 |
|       |              | TMTT                           | 1.454 | 0.252 | 0.008  |
|       | > Cvi        | TMTT                           | 1.558 | 0.240 | 0.005  |
|       | > Kond       | MeSA                           | 1.050 | 0.130 | 0.008  |
|       | > Kyo-1      | MeSA                           | 0.706 | 0.120 | 0.030  |
|       | > WS         | ( <i>E</i> )-nerolidol         | 6.193 | 1.194 | 0.047  |
| C24   | > Cvi        | MeSA                           | 1.182 | 0.135 | 0.001  |
|       | > Kond       | $\beta$ -bisbolene             | 7.166 | 0.312 | <0.001 |
|       | > Kyo-1      | $\alpha$ -humulene             | 1.294 | 0.170 | 0.002  |
|       | > <i>Ler</i> | ( <i>E</i> )-2-hexenal         | 7.148 | 1.202 | 0.047  |
| Cvi   | > An-1       | $\beta$ -myrcene               | 0.836 | 0.160 | 0.019  |
|       |              | ( <i>Z</i> )-hexenyl acetate   | 1.442 | 0.126 | <0.001 |
|       | > Col-0      | 3-hexen-1ol                    | 1.045 | 0.155 | 0.012  |
|       | > C24        | ( <i>Z</i> )-hexenyl acetate   | 1.620 | 0.163 | 0.001  |
|       |              | indole                         | 6.170 | 0.312 | 0.001  |
|       |              | $\beta$ -farnesene             | 1.104 | 0.144 | 0.018  |
|       |              | $\beta$ -farnesene             | 1.104 | 0.144 | 0.018  |
|       | > Kyo-1      | $\beta$ -acoradiene            | 0.564 | 0.119 | 0.032  |
| Eri-1 | > An-1       | decanal                        | 1.066 | 0.218 | 0.050  |
|       |              | $\beta$ -myrcene               | 0.622 | 0.138 | 0.044  |
|       | > Col-0      | 3-hexen-1ol                    | 1.899 | 0.180 | 0.002  |
|       | > C24        | MeSA                           | 1.180 | 0.115 | 0.001  |
|       | > Cvi        | decanal                        | 1.164 | 0.251 | 0.040  |
|       |              | $\alpha$ -farnesene            | 1.286 | 0.183 | 0.003  |
| Kond  | > An-1       | $\beta$ -myrcene               | 0.846 | 0.156 | 0.015  |
|       | > Col-0      | 3-hexen-1ol                    | 2.313 | 0.156 | <0.001 |
|       |              | ( <i>Z</i> )- $\beta$ -ocimene | 1.005 | 0.196 | 0.016  |
|       |              | ( <i>E</i> )- $\beta$ -ocimene | 1.202 | 0.183 | 0.007  |
|       |              | geranyl acetone                | 6.275 | 1.150 | 0.041  |

|              |         |                                |                     |       |        |
|--------------|---------|--------------------------------|---------------------|-------|--------|
|              | > C24   | 3-hexen-1ol                    | 2.334               | 0.426 | 0.041  |
|              |         | benzaldehyde                   | 1.158               | 0.213 | 0.020  |
|              |         | ( <i>E</i> )- $\beta$ -ocimene | 1.274               | 0.108 | <0.001 |
|              |         | $\beta$ -farnesene             | 1.096               | 0.084 | 0.002  |
|              |         | TMTT                           | 1.188               | 0.231 | 0.022  |
|              | > Cvi   | 3-hexen-1ol                    | 1.268               | 0.201 | 0.005  |
|              |         | TMTT                           | 1.292               | 0.218 | 0.012  |
|              | > WS    | ( <i>E</i> )-nerolidol         | 6.190               | 1.187 | 0.048  |
|              | Kyo-1   | > Col-0                        | $\alpha$ -farnesene | 1.106 | 0.205  |
| > C24        |         | $\beta$ -farnesene             | 1.048               | 0.687 | 0.001  |
|              |         | $\alpha$ -farnesene            | 1.304               | 0.266 | 0.040  |
| > Cvi        |         | MeSA                           | 0.896               | 0.149 | 0.008  |
|              |         | $\alpha$ -farnesene            | 1.714               | 0.183 | <0.001 |
| > Kond       |         | $\beta$ -bisbolene             | 5.790               | 0.343 | 0.001  |
| > <i>Ler</i> |         | $\alpha$ -farnesene            | 1.096               | 0.233 | 0.040  |
| <i>Ler</i>   | > An-1  | $\beta$ -myrcene               | 0.834               | 0.151 | 0.013  |
|              | > Col-0 | ( <i>Z</i> )- $\beta$ -ocimene | 0.955               | 0.157 | 0.009  |
|              | > C24   | benzaldehyde                   | 1.380               | 0.207 | 0.008  |
|              | > Cvi   | ( <i>Z</i> )- $\beta$ -ocimene | 0.524               | 0.096 | 0.014  |
|              |         | MeSA                           | 1.400               | 0.128 | <0.001 |
|              | > Kond  | MeSA                           | 0.848               | 0.149 | 0.015  |
| WS           | > An-1  | decanal                        | 1.492               | 0.129 | <0.001 |
|              | > Col-0 | 3-hexen-1ol                    | 1.962               | 0.169 | <0.001 |
|              | > C24   | ( <i>Z</i> )- $\beta$ -ocimene | 0.870               | 0.149 | 0.017  |
|              |         | ( <i>E</i> )- $\beta$ -ocimene | 1.008               | 0.210 | 0.021  |
|              | > Cvi   | ( <i>Z</i> )- $\beta$ -ocimene | 0.439               | 0.082 | 0.015  |
|              |         | ( <i>E</i> )- $\beta$ -ocimene | 1.080               | 0.149 | 0.002  |
|              |         | $\beta$ -farnesene             | 0.918               | 0.132 | 0.014  |
|              |         | TMTT                           | 0.917               | 0.196 | 0.030  |

|                      |                   | 3-hexen-1ol                    | 0.917                                        | 0.211             | 0.042        |
|----------------------|-------------------|--------------------------------|----------------------------------------------|-------------------|--------------|
|                      |                   | MeSA                           | 1.273                                        | 0.163             | 0.001        |
|                      |                   | decanal                        | 1.590                                        | 0.179             | 0.002        |
| <b>jasmonic acid</b> |                   |                                |                                              |                   |              |
| <b>Geno I</b>        | <b>&gt;Geno J</b> | <b>Compound</b>                | <b>Mean<sup>1</sup> Difference<br/>(I-J)</b> | <b>Std. Error</b> | <b>Sign.</b> |
| An-1                 | > Col-0           | ( <i>E</i> )- $\beta$ -ocimene | 0.957                                        | 0.192             | 0.031        |
|                      | > Cvi             | $\beta$ -sesquiphellandrene    | 1.068                                        | 0.224             | 0.031        |
|                      |                   | TMTT                           | 0.828                                        | 0.148             | 0.027        |
|                      | > Eri-1           | $\beta$ -sesquiphellandrene    | 0.892                                        | 0.192             | 0.043        |
|                      | > Kyo-1           | ( <i>Z</i> )- $\beta$ -ocimene | 1.052                                        | 0.143             | 0.012        |
|                      |                   | ( <i>E</i> )- $\beta$ -ocimene | 1.392                                        | 0.205             | 0.004        |
| Col-0                | > Cvi             | MeSA                           | 1.505                                        | 0.573             | <0.001       |
|                      | > Eri-1           | MeSA                           | 1.253                                        | 0.180             | 0.020        |
| C24                  | > Col-0           | ( <i>Z</i> )- $\beta$ -ocimene | 0.980                                        | 0.229             | 0.049        |
|                      |                   | DMNT                           | 1.672                                        | 0.257             | 0.004        |
|                      | > Kyo-1           | ( <i>Z</i> )- $\beta$ -ocimene | 1.082                                        | 0.145             | 0.011        |
|                      |                   | ( <i>E</i> )- $\beta$ -ocimene | 1.098                                        | 0.227             | 0.037        |
|                      | > WS              | $\beta$ -bisbolene             | 5.974                                        | 1.154             | 0.039        |
| Cvi                  | > An-1            | $\beta$ -myrcene               | 0.638                                        | 0.126             | 0.025        |
|                      |                   | ethylsalicylate                | 5.564                                        | 0.343             | 0.001        |
|                      | > Col-0           | $\beta$ -myrcene               | 0.885                                        | 0.168             | 0.014        |
|                      |                   | ( <i>Z</i> )- $\beta$ -ocimene | 1.176                                        | 0.231             | 0.017        |
|                      | > Eri-1           | ethylsalicylate                | 5.564                                        | 0.343             | 0.001        |
|                      | > Kyo-1           | ( <i>Z</i> )- $\beta$ -ocimene | 1.278                                        | 0.148             | 0.006        |
|                      | > Kyo-1           | ( <i>E</i> )- $\beta$ -ocimene | 1.108                                        | 0.199             | 0.013        |
|                      | > <i>Ler</i>      | $\beta$ -myrcene               | 0.734                                        | 0.147             | 0.024        |
| Eri-1                | > Col-0           | $\beta$ -myrcene               | 0.969                                        | 0.198             | 0.022        |

|            |              |                                |                                |       |        |        |
|------------|--------------|--------------------------------|--------------------------------|-------|--------|--------|
|            | > C24        | $\alpha$ -farnesene            | 1.478                          | 0.215 | 0.003  |        |
|            | > Kyo-1      | ( <i>E</i> )- $\beta$ -ocimene | 0.816                          | 0.154 | 0.023  |        |
|            | > <i>Ler</i> | $\beta$ -myrcene               | 0.818                          | 0.180 | 0.047  |        |
|            | > WS         | $\alpha$ -farnesene            | 1.205                          | 0.209 | 0.007  |        |
|            |              | $\beta$ -bisbolene             | 7.034                          | 1.140 | 0.019  |        |
| Kond       | > An-1       | $\alpha$ -pinene               | 0.686                          | 0.115 | 0.021  |        |
|            |              | $\beta$ -myrcene               | 1.110                          | 0.091 | <0.001 |        |
|            | > Col-0      | $\beta$ -myrcene               | 1.357                          | 0.144 | 0.001  |        |
|            |              | ( <i>Z</i> )- $\beta$ -ocimene | 1.682                          | 0.197 | 0.002  |        |
|            |              | ( <i>E</i> )- $\beta$ -ocimene | 1.531                          | 0.115 | <0.001 |        |
|            |              | DMNT                           | 0.950                          | 0.189 | 0.023  |        |
|            | > C24        | $\beta$ -myrcene               | 1.250                          | 0.149 | 0.007  |        |
|            |              | $\alpha$ -farnesene            | 1.266                          | 0.244 | 0.019  |        |
|            | > Cvi        | ( <i>E</i> )- $\beta$ -ocimene | 0.858                          | 0.160 | 0.049  |        |
|            |              | $\beta$ -sesquiphellandrene    | 1.208                          | 0.240 | 0.023  |        |
|            |              | MeSA                           | 1.074                          | 0.099 | 0.002  |        |
|            |              | TMTT                           | 1.386                          | 0.179 | 0.008  |        |
|            | > Eri-1      | ( <i>Z</i> )- $\beta$ -ocimene | 0.954                          | 0.165 | 0.024  |        |
|            |              | ( <i>E</i> )- $\beta$ -ocimene | 1.150                          | 0.099 | <0.001 |        |
|            |              | $\beta$ -sesquiphellandrene    | 1.032                          | 0.210 | 0.037  |        |
|            | > Kyo-1      | ( <i>Z</i> )- $\beta$ -ocimene | 1.784                          | 0.085 | <0.001 |        |
|            | Kond         | > Kyo-1                        | ( <i>E</i> )- $\beta$ -ocimene | 1.966 | 0.136  | <0.001 |
|            |              | > <i>Ler</i>                   | $\beta$ -myrcene               | 1.206 | 0.118  | 0.002  |
|            |              |                                | ( <i>Z</i> )- $\beta$ -ocimene | 0.962 | 0.175  | 0.033  |
| > WS       |              | $\beta$ -myrcene               | 0.857                          | 0.143 | 0.017  |        |
| Kyo-1      | > Cvi        | MeSA                           | 1.078                          | 0.139 | 0.012  |        |
|            |              | TMTT                           | 1.108                          | 0.099 | <0.001 |        |
| <i>Ler</i> | > An-1       | $\alpha$ -pinene               | 0.732                          | 0.134 | 0.039  |        |
|            |              | ethylsalicylate                | 6.228                          | 0.153 | <0.001 |        |

|                |                    |                        |                                              |                   |              |
|----------------|--------------------|------------------------|----------------------------------------------|-------------------|--------------|
|                | > Cvi              | MeSA                   | 1.900                                        | 0.120             | <0.001       |
|                |                    | TMTT                   | 1.592                                        | 0.201             | 0.009        |
|                | > Eri-1            | MeSA                   | 1.648                                        | 0.208             | 0.002        |
|                |                    | ethylsalicylate        | 6.228                                        | 0.153             | <0.001       |
|                | > Kond             | MeSA                   | 0.826                                        | 0.147             | 0.013        |
|                | > Kyo-1            | MeSA                   | 0.822                                        | 0.176             | 0.037        |
| WS             | >Col-0             | (Z)- $\beta$ -ocimene  | 1.257                                        | 0.242             | 0.011        |
|                |                    | (E)- $\beta$ -ocimene  | 1.298                                        | 0.154             | <0.001       |
|                |                    | DMNT                   | 1.412                                        | 0.196             | 0.001        |
|                | > Cvi              | MeSA                   | 1.585                                        | 0.136             | 0.001        |
|                | > Eri-1            | (E)- $\beta$ -ocimene  | 0.918                                        | 0.142             | 0.003        |
|                |                    | MeSA                   | 1.333                                        | 0.218             | 0.007        |
|                |                    | geranyl acetone        | 6.608                                        | 1.108             | 0.039        |
|                | > Kyo-1            | (Z)- $\beta$ -ocimene  | 1.359                                        | 0.164             | 0.004        |
|                |                    | (E)- $\beta$ -ocimene  | 1.734                                        | 0.170             | <0.001       |
| <b>Control</b> |                    |                        |                                              |                   |              |
| <b>Geno I</b>  | <b>&gt; Geno J</b> | <b>Compound</b>        | <b>Mean<sup>1</sup> Difference<br/>(I-J)</b> | <b>Std. Error</b> | <b>Sign.</b> |
| An-1           | > Col-0            | 3-carene               | 5.740                                        | 0.199             | <0.001       |
|                | > WS               | MeSA                   | 1.031                                        | 0.201             | 0.036        |
| Col-0          | > <i>Ler</i>       | $\beta$ -farnesene     | 0.922                                        | 0.155             | 0.007        |
| C24            | > Col-0            | DMNT                   | 1.030                                        | 0.155             | 0.001        |
|                |                    | (E)-nerolidol          | 5.887                                        | 1.125             | 0.039        |
|                | > Kyo-1            | pentan-2-ol            | 5.232                                        | 1.133             | 0.042        |
|                | > <i>Ler</i>       | hexanoic acid          | 6.540                                        | 0.087             | <0.001       |
| Cvi            | > Col-0            | $\alpha$ -phellandrene | 5.557                                        | 1.042             | 0.045        |
|                | > Kyo-1            | pentan-2-ol            | 5.518                                        | 1.122             | 0.032        |
| Eri-1          | > WS               | MeSA                   | 0.789                                        | 0.171             | 0.045        |

|       |              |                        |       |       |       |
|-------|--------------|------------------------|-------|-------|-------|
| Kond  | > An-1       | (Z)- $\beta$ -ocimene  | 1.073 | 0.175 | 0.004 |
|       | > Col-0      | $\alpha$ -phellandrene | 5.479 | 1.042 | 0.048 |
|       |              | DMNT                   | 0.913 | 0.133 | 0.001 |
|       | > Cvi        | (Z)- $\beta$ -ocimene  | 1.620 | 0.346 | 0.050 |
|       | > <i>Ler</i> | $\beta$ -farnesene     | 0.748 | 0.163 | 0.029 |
| Kyo-1 | > WS         | MeSA                   | 0.707 | 0.131 | 0.005 |
| WS    | > Col-0      | (E)-3-hexanal          | 1.757 | 0.280 | 0.009 |
|       |              | (Z) 2-penten-1-ol      | 6.405 | 1.199 | 0.036 |
|       |              | DMNT                   | 0.902 | 0.153 | 0.005 |
|       | > C24        | (E)-3-hexanal          | 1.598 | 0.278 | 0.015 |

**Table S6.** Results of t-tests for each volatile compound on differences between non-treated plants and *P. rapae*-infested plants, and non-treated plants and JA-treated plants.

| <b>P. rapae</b> |                             | <b>F</b> | <b>Sig.2tail</b> | <b>Jasmonic acid</b> |                             | <b>F</b> | <b>Sig.2tail</b> |
|-----------------|-----------------------------|----------|------------------|----------------------|-----------------------------|----------|------------------|
| <b>An-1</b>     | (Z)- $\beta$ -ocimene       | 0,023    | 2,83E-06         | <b>An-1</b>          | (Z)- $\beta$ -ocimene       | 0,358    | 7,96E-06         |
| <b>An-1</b>     | MeSA                        | 5,825    | 4,80E-04         | <b>An-1</b>          | (E)- $\beta$ -ocimene       | 0,009    | 4,28E-04         |
| <b>An-1</b>     | $\alpha$ -farnesene         | 0,014    | 0,001            | <b>An-1</b>          | $\alpha$ -farnesene         | 0,000    | 0,002            |
| <b>An-1</b>     | geraniol                    | 2,570    | 0,003            | <b>An-1</b>          | TMTT                        | 1,503    | 0,004            |
| <b>An-1</b>     | $\alpha$ -terpineol         | 4,333    | 0,005            | <b>An-1</b>          | $\beta$ -sesquiphellandrene | 2,442    | 0,012            |
| <b>An-1</b>     | DMNT                        | 4,379    | 0,010            | <b>An-1</b>          | geraniol                    | 0,379    | 0,023            |
| <b>An-1</b>     | $\beta$ -sesquiphellandrene | 1,620    | 0,011            | <b>An-1</b>          | (Z)-nerolidol               | 2,488    | 0,044            |
| <b>An-1</b>     | (E)- $\beta$ -ocimene       | 0,622    | 0,011            | <b>An-1</b>          | ethylsalicylate             | 44,108   | 0,075            |
| <b>An-1</b>     | (E)-2-hexenal               | 0,148    | 0,015            | <b>An-1</b>          | DMNT                        | 2,074    | 0,078            |
| <b>An-1</b>     | (Z)-3-hexen-1-ol            | 85,282   | 0,044            |                      |                             |          |                  |
| <b>An-1</b>     | octanal                     | 0,337    | 0,059            |                      |                             |          |                  |
| <b>An-1</b>     | (Z)-2-penten-1-ol           | 44,425   | 0,060            |                      |                             |          |                  |
| <b>An-1</b>     | nerol                       | 4,382    | 0,067            |                      |                             |          |                  |
| <b>An-1</b>     | 3-carene                    | 56,757   | 0,072            |                      |                             |          |                  |
| <b>An-1</b>     | geranylisovalerate          | 1,025    | 0,084            |                      |                             |          |                  |
| <b>An-1</b>     | $\beta$ -elemene            | 15,297   | 0,084            |                      |                             |          |                  |
| <b>An-1</b>     | allo ocimene                | 5,898    | 0,085            |                      |                             |          |                  |
| <b>An-1</b>     | A-terpinene                 | 5,164    | 0,088            |                      |                             |          |                  |
| <b>An-1</b>     | $\beta$ -bisbolene          | 62,390   | 0,089            |                      |                             |          |                  |
| <b>Col-0</b>    | MeSA                        | 4,207    | 2,32E-07         | <b>Col-0</b>         | MeSA                        | 3,887    | 7,57E-06         |
| <b>Col-0</b>    | (E)-nerolidol               | 3,933    | 2,02E-04         | <b>Col-0</b>         | (Z)-2-penten-1-ol           | 3,806    | 1,60E-04         |
| <b>Col-0</b>    | TMTT                        | 2,574    | 0,001            | <b>Col-0</b>         | (E)-nerolidol               | 4,810    | 2,10E-04         |
| <b>Col-0</b>    | (Z)- $\beta$ -ocimene       | 0,045    | 0,002            | <b>Col-0</b>         | $\alpha$ -phellandrene      | 0,000    | 0,018            |
| <b>Col-0</b>    | DMNT                        | 0,471    | 0,004            | <b>Col-0</b>         | TMTT                        | 1,359    | 0,045            |
| <b>Col-0</b>    | linalool                    | 1,299    | 0,052            | <b>Col-0</b>         | $\alpha$ -farnesene         | 297,446  | 0,048            |

|              |                             |         |          |              |                       |           |          |
|--------------|-----------------------------|---------|----------|--------------|-----------------------|-----------|----------|
| <b>Col-0</b> | (Z)-3-hexen-1-ol            | 458,342 | 0,069    | <b>Col-0</b> | (Z)- $\beta$ -ocimene | 0,864     | 0,051    |
| <b>Col-0</b> | decanal                     | 0,418   | 0,069    | <b>Col-0</b> | 3-carene              | 2,939,156 | 0,076    |
| <b>Col-0</b> | $\alpha$ -farnesene         | 586,641 | 0,072    |              |                       |           |          |
| <b>Col-0</b> | (Z)-2-penten-1-ol           | 2,332   | 0,077    |              |                       |           |          |
| <b>Col-0</b> | (E)-hexenyl acetate         | 25,916  | 0,094    |              |                       |           |          |
| <b>C-24</b>  | pentan-2-ol                 | 6,816   | 4,41E-08 | <b>C-24</b>  | (E)- $\beta$ -ocimene | 1,934     | 8,03E-06 |
| <b>C-24</b>  | MeSA                        | 6,603   | 3,90E-06 | <b>C-24</b>  | (Z)- $\beta$ -ocimene | 0,594     | 1,49E-04 |
| <b>C-24</b>  | (E)- $\beta$ -ocimene       | 0,214   | 8,48E-06 | <b>C-24</b>  | MeSA                  | 0,165     | 0,002    |
| <b>C-24</b>  | hexanoic acid               | 3,265   | 5,23E-05 | <b>C-24</b>  | DMNT                  | 0,156     | 0,014    |
| <b>C-24</b>  | (Z)- $\beta$ -ocimene       | 3,796   | 3,48E-04 | <b>C-24</b>  | ethylsalicylate       | 0,112     | 0,016    |
| <b>C-24</b>  | (E)-2-hexenal               | 0,496   | 4,28E-04 | <b>C-24</b>  | (E)-hexenyl acetate   | 0,158     | 0,027    |
| <b>C-24</b>  | 4-me-3-penten-2-one         | 3,446   | 0,002    | <b>C-24</b>  | 6-me-5-hepten-2-one   | 1,724     | 0,038    |
| <b>C-24</b>  | 1-pentanol                  | 3,614   | 0,008    | <b>C-24</b>  | $\beta$ -farnesene    | 1,500     | 0,061    |
| <b>C-24</b>  | indole                      | 16,298  | 0,009    | <b>C-24</b>  | $\alpha$ -humulene    | 0,296     | 0,098    |
| <b>C-24</b>  | 11-octen-1-ol               | 0,014   | 0,011    |              |                       |           |          |
| <b>C-24</b>  | $\alpha$ -terpineol         | 3,710   | 0,013    |              |                       |           |          |
| <b>C-24</b>  | benzaldehyde                | 0,103   | 0,016    |              |                       |           |          |
| <b>C-24</b>  | 6-me-5-hepten-2-one         | 0,082   | 0,016    |              |                       |           |          |
| <b>C-24</b>  | (E)-nerolidol               | 0,089   | 0,016    |              |                       |           |          |
| <b>C-24</b>  | $\alpha$ -humulene          | 0,165   | 0,024    |              |                       |           |          |
| <b>C-24</b>  | $\beta$ -myrcene            | 0,041   | 0,027    |              |                       |           |          |
| <b>C-24</b>  | $\beta$ -chamigrene         | 1,980   | 0,031    |              |                       |           |          |
| <b>C-24</b>  | $\beta$ -farnesene          | 9,643   | 0,035    |              |                       |           |          |
| <b>C-24</b>  | (E)- $\beta$ -caryophyllene | 0,100   | 0,040    |              |                       |           |          |
| <b>C-24</b>  | thujopsene                  | 31,742  | 0,042    |              |                       |           |          |
| <b>C-24</b>  | (Z)-3-hexen-1-ol            | 0,540   | 0,049    |              |                       |           |          |
| <b>C-24</b>  | (E)-hexenyl acetate         | 0,205   | 0,064    |              |                       |           |          |
| <b>C-24</b>  | $\beta$ -elemene            | 1,867   | 0,076    |              |                       |           |          |
| <b>Cvi</b>   | (Z)-hexenyl acetate         | 1,238   | 8,15E-07 | <b>Cvi</b>   | (Z)- $\beta$ -ocimene | 1,580     | 7,33E-05 |



|              |                             |           |          |              |                        |         |          |
|--------------|-----------------------------|-----------|----------|--------------|------------------------|---------|----------|
| <b>Cvi</b>   | (Z)- $\beta$ -ocimene       | 0,957     | 0,001    | <b>Cvi</b>   | (E)- $\beta$ -ocimene  | 0,082   | 1,17E-04 |
| <b>Cvi</b>   | trans pinane                | 2,702     | 0,003    | <b>Cvi</b>   | $\beta$ -myrcene       | 2,246   | 4,22E-04 |
| <b>Cvi</b>   | $\beta$ -myrcene            | 0,834     | 0,004    | <b>Cvi</b>   | linalool               | 0,365   | 0,004    |
| <b>Cvi</b>   | $\alpha$ -phellandrene      | 0,097     | 0,005    | <b>Cvi</b>   | (Z)-hexenyl acetate    | 1,243   | 0,005    |
| <b>Cvi</b>   | linalool                    | 0,785     | 0,007    | <b>Cvi</b>   | 1-pentanol             | 2,419   | 0,020    |
| <b>Cvi</b>   | 1-pentanol                  | 0,466     | 0,014    | <b>Cvi</b>   | (E)-nerolidol          | 133,242 | 0,029    |
| <b>Cvi</b>   | (E)- $\beta$ -ocimene       | 1,801     | 0,016    | <b>Cvi</b>   | $\alpha$ -phellandrene | 2,858   | 0,030    |
| <b>Cvi</b>   | $\beta$ -acoradiene         | 2,343     | 0,028    | <b>Cvi</b>   | acetophenone           | 1,304   | 0,035    |
| <b>Cvi</b>   | $\beta$ -farnesene          | 0,002     | 0,037    | <b>Cvi</b>   | (E)-3-hexenal          | 855,557 | 0,051    |
| <b>Cvi</b>   | geranyl acetone             | 61,472    | 0,042    | <b>Cvi</b>   | 3-carene               | 206,499 | 0,052    |
| <b>Cvi</b>   | (E)- $\beta$ -caryophyllene | 1,701     | 0,059    | <b>Cvi</b>   | (Z)-2-penten-1-ol      | 26,958  | 0,055    |
| <b>Cvi</b>   | benzaldehyde                | 3,059     | 0,064    | <b>Cvi</b>   | g terpinene            | 1,559   | 0,057    |
| <b>Cvi</b>   | $\alpha$ -terpinene         | 0,065     | 0,065    | <b>Cvi</b>   | geranyl acetone        | 116,002 | 0,071    |
| <b>Cvi</b>   | MeSA                        | 2,537     | 0,068    |              |                        |         |          |
| <b>Cvi</b>   | $\alpha$ -farnesene         | 447,986   | 0,069    |              |                        |         |          |
| <b>Cvi</b>   | hexan-2-ol                  | 0,202     | 0,074    |              |                        |         |          |
| <b>Cvi</b>   | pentan-2-ol                 | 92,570    | 0,085    |              |                        |         |          |
| <b>Cvi</b>   | (E)-2-hexanal               | 3,809     | 0,094    |              |                        |         |          |
| <b>Cvi</b>   | verbenone                   | 0,148     | 0,096    |              |                        |         |          |
| <b>Cvi</b>   | (E)-3-hexanal               | 1.117,670 | 0,096    |              |                        |         |          |
| <b>Cvi</b>   | (E)-nerolidol               | 42,628    | 0,100    |              |                        |         |          |
| <b>Eri-1</b> | MeSA                        | 2,004     | 8,59E-05 | <b>Eri-1</b> | $\alpha$ -farnesene    | 0,004   | 4,23E-06 |
| <b>Eri-1</b> | (Z)- $\beta$ -ocimene       | 0,895     | 3,26E-04 | <b>Eri-1</b> | (E)- $\beta$ -ocimene  | 2,622   | 0,002    |
| <b>Eri-1</b> | (E)- $\beta$ -ocimene       | 0,023     | 0,001    | <b>Eri-1</b> | (Z)- $\beta$ -ocimene  | 0,250   | 0,003    |
| <b>Eri-1</b> | $\alpha$ -farnesene         | 0,059     | 0,001    | <b>Eri-1</b> | $\alpha$ -humulene     | 0,336   | 0,005    |
| <b>Eri-1</b> | DMNT                        | 2,589     | 0,005    | <b>Eri-1</b> | DMNT                   | 1,995   | 0,006    |
| <b>Eri-1</b> | linalool                    | 0,778     | 0,011    | <b>Eri-1</b> | TMTT                   | 0,012   | 0,038    |
| <b>Eri-1</b> | TMTT                        | 0,124     | 0,022    | <b>Eri-1</b> | $\beta$ -bisbolene     | 47,132  | 0,063    |
| <b>Eri-1</b> | $\alpha$ -humulene          | 0,088     | 0,038    | <b>Eri-1</b> | $\beta$ -farnesene     | 0,141   | 0,068    |

|              |                       |         |          |              |                             |           |          |
|--------------|-----------------------|---------|----------|--------------|-----------------------------|-----------|----------|
| <b>Eri-1</b> | (Z)-3-hexen-1-ol      | 68,315  | 0,050    | <b>Eri-1</b> | ethylsalicylate             | 60,631    | 0,073    |
| <b>Eri-1</b> | octanal               | 74,681  | 0,071    | <b>Eri-1</b> | (E)-2-hexenal               | 47,663    | 0,081    |
| <b>Eri-1</b> | heptanal              | 0,250   | 0,076    | <b>Eri-1</b> | heptanal                    | 0,018     | 0,087    |
|              |                       |         |          | <b>Eri-1</b> | $\beta$ -myrcene            | 78,719    | 0,093    |
| <b>Kond</b>  | (E)- $\beta$ -ocimene | 1,150   | 6,73E-06 | <b>Kond</b>  | (E)- $\beta$ -ocimene       | 3,553     | 1,63E-06 |
| <b>Kond</b>  | (Z)- $\beta$ -ocimene | 0,022   | 2,57E-04 | <b>Kond</b>  | (Z)- $\beta$ -ocimene       | 2,020     | 5,03E-06 |
| <b>Kond</b>  | (Z)-nerolidol         | 0,220   | 0,001    | <b>Kond</b>  | (Z)-nerolidol               | 0,100     | 2,55E-05 |
| <b>Kond</b>  | $\beta$ -bisbolene    | 4,718   | 0,002    | <b>Kond</b>  | $\beta$ -myrcene            | 3,208     | 4,78E-04 |
| <b>Kond</b>  | 2-pentanal            | 0,182   | 0,007    | <b>Kond</b>  | MeSA                        | 1,399     | 0,005    |
| <b>Kond</b>  | MeSA                  | 0,428   | 0,007    | <b>Kond</b>  | $\alpha$ -pinene            | 0,581     | 0,025    |
| <b>Kond</b>  | $\beta$ -elemene      | 0,085   | 0,017    | <b>Kond</b>  | $\beta$ -farnesene          | 0,020     | 0,027    |
| <b>Kond</b>  | (E)-hexenyl acetate   | 1,274   | 0,020    | <b>Kond</b>  | $\beta$ -bisbolene          | 0,011     | 0,029    |
| <b>Kond</b>  | 1-nonene              | 4,542   | 0,032    | <b>Kond</b>  | (E)-3-hexen-1-ol            | 0,108     | 0,043    |
| <b>Kond</b>  | $\beta$ -myrcene      | 0,966   | 0,035    | <b>Kond</b>  | $\beta$ -sesquiphellandrene | 0,020     | 0,045    |
| <b>Kond</b>  | TMTT                  | 3,853   | 0,065    | <b>Kond</b>  | $\alpha$ -farnesene         | 3,265     | 0,062    |
| <b>Kond</b>  | (Z)-3-hexen-1-ol      | 26,140  | 0,065    | <b>Kond</b>  | TMTT                        | 3,626     | 0,066    |
| <b>Kond</b>  | $\alpha$ -pinene      | 0,004   | 0,073    | <b>Kond</b>  | $\alpha$ -phellandrene      | 0,147     | 0,088    |
| <b>Kond</b>  | (E)-3-hexenal         | 21,423  | 0,076    |              |                             |           |          |
| <b>Kyo-1</b> | MeSA                  | 0,001   | 5,30E-05 | <b>Kyo-1</b> | MeSA                        | 0,046     | 0,003    |
| <b>Kyo-1</b> | $\alpha$ -farnesene   | 46,460  | 0,012    | <b>Kyo-1</b> | (Z)-nerolidol               | 0,420     | 0,005    |
| <b>Kyo-1</b> | $\alpha$ -himachalene | 155,770 | 0,019    | <b>Kyo-1</b> | $\alpha$ -farnesene         | 37,732    | 0,009    |
| <b>Kyo-1</b> | limonene              | 39,446  | 0,020    | <b>Kyo-1</b> | (E,E)-2,4-hexadienal        | 0,902     | 0,019    |
| <b>Kyo-1</b> | hexanoic acid         | 76,421  | 0,041    | <b>Kyo-1</b> | $\alpha$ -himachalene       | 116,646   | 0,031    |
| <b>Kyo-1</b> | trans pinane          | 422,776 | 0,048    | <b>Kyo-1</b> | trans pinane                | 1.675,678 | 0,055    |
| <b>Kyo-1</b> | terpinolene           | 0,120   | 0,064    | <b>Kyo-1</b> | (E)- $\beta$ -ocimene       | 4,216     | 0,057    |
|              |                       |         |          | <b>Kyo-1</b> | $\beta$ -myrcene            | 8,423     | 0,061    |
|              |                       |         |          | <b>Kyo-1</b> | terpinolene                 | 0,033     | 0,076    |
| <b>Ler</b>   | hexanoic acid         | 16,710  | 1,38E-04 | <b>Ler</b>   | MeSA                        | 5,625     | 0,001    |
| <b>Ler</b>   | (E)- $\beta$ -ocimene | 0,800   | 0,001    | <b>Ler</b>   | (E)- $\beta$ -ocimene       | 0,037     | 0,005    |

|            |                             |         |          |            |                             |           |          |
|------------|-----------------------------|---------|----------|------------|-----------------------------|-----------|----------|
| <b>Ler</b> | MeSA                        | 8,118   | 0,001    | <b>Ler</b> | $\beta$ -sesquiphellandrene | 3,207     | 0,014    |
| <b>Ler</b> | $\beta$ -sesquiphellandrene | 4,187   | 0,008    | <b>Ler</b> | ethylsalicylate             | 183,936   | 0,042    |
| <b>Ler</b> | DMNT                        | 9,416   | 0,015    | <b>Ler</b> | (Z)- $\beta$ -ocimene       | 24,405    | 0,050    |
| <b>Ler</b> | $\beta$ -farnesene          | 1,505   | 0,024    | <b>Ler</b> | decanal                     | 1.021,292 | 0,052    |
| <b>Ler</b> | (E)-2-hexenal               | 0,003   | 0,026    | <b>Ler</b> | pulegone                    | 178,818   | 0,053    |
| <b>Ler</b> | $\alpha$ -copaene           | 0,011   | 0,029    | <b>Ler</b> | 3-carene                    | 974,396   | 0,076    |
| <b>Ler</b> | (Z)- $\beta$ -ocimene       | 27,146  | 0,032    | <b>Ler</b> | geraniol                    | 352,990   | 0,077    |
| <b>Ler</b> | acetophenone                | 178,215 | 0,047    | <b>Ler</b> | (Z)-3-hexenal               | 0,959     | 0,079    |
| <b>Ler</b> | (E)-3-hexanal               | 25,167  | 0,057    | <b>Ler</b> | allo ocimene                | 149,587   | 0,084    |
| <b>Ler</b> | pulegone                    | 84,486  | 0,067    | <b>Ler</b> | TMTT                        | 6,776     | 0,089    |
| <b>Ler</b> | allo ocimene                | 673,440 | 0,074    | <b>Ler</b> | $\beta$ -farnesene          | 3,541     | 0,090    |
| <b>Ler</b> | 3-carene                    | 974,396 | 0,076    |            |                             |           |          |
| <b>Ler</b> | (E)-hexenyl acetate         | 22,177  | 0,090    |            |                             |           |          |
| <b>WS</b>  | MeSA                        | 0,443   | 2,13E-07 | <b>WS</b>  | MeSA                        | 0,541     | 5,86E-07 |
| <b>WS</b>  | (Z)- $\beta$ -ocimene       | 2,285   | 1,39E-05 | <b>WS</b>  | (Z)- $\beta$ -ocimene       | 0,033     | 5,42E-05 |
| <b>WS</b>  | TMTT                        | 2,205   | 3,09E-05 | <b>WS</b>  | nonanal                     | 0,254     | 0,009    |
| <b>WS</b>  | nonanal                     | 0,520   | 0,002    | <b>WS</b>  | DMNT                        | 0,011     | 0,009    |
| <b>WS</b>  | (E)-hexenyl acetate         | 3,563   | 0,003    | <b>WS</b>  | linalool                    | 1,124     | 0,014    |
| <b>WS</b>  | $\beta$ -farnesene          | 0,148   | 0,015    | <b>WS</b>  | (E)-hexenyl acetate         | 6,100     | 0,019    |
| <b>WS</b>  | 2-pentanal                  | 35,049  | 0,018    | <b>WS</b>  | $\beta$ -farnesene          | 0,307     | 0,025    |
| <b>WS</b>  | (E)- $\beta$ -ocimene       | 4,715   | 0,029    | <b>WS</b>  | geranyl acetone             | 293,039   | 0,038    |
| <b>WS</b>  | $\beta$ -myrcene            | 33,865  | 0,056    | <b>WS</b>  | (E)- $\beta$ -ocimene       | 5,071     | 0,045    |
| <b>WS</b>  | (Z)-3-hexen-1-ol            | 4,346   | 0,079    | <b>WS</b>  | $\beta$ -myrcene            | 30,728    | 0,050    |
| <b>WS</b>  | cuparene                    | 1,679   | 0,097    | <b>WS</b>  | $\beta$ -sesquiphellandrene | 4,477     | 0,054    |
|            |                             |         |          | <b>WS</b>  | $\alpha$ -farnesene         | 408,025   | 0,060    |
|            |                             |         |          | <b>WS</b>  | pulegone                    | 4.725,005 | 0,061    |
|            |                             |         |          | <b>WS</b>  | hexan-2-ol                  | 0,491     | 0,063    |
|            |                             |         |          | <b>WS</b>  | hexanal                     | 4,296     | 0,063    |
|            |                             |         |          | <b>WS</b>  | (E)-2-hexenal               | 2.309,289 | 0,065    |

|  |  |  |  |           |                 |                  |              |
|--|--|--|--|-----------|-----------------|------------------|--------------|
|  |  |  |  | <b>WS</b> | TMTT            | <i>41,050</i>    | <i>0,076</i> |
|  |  |  |  | <b>WS</b> | ethylsalicylate | <i>4.771,445</i> | <i>0,083</i> |

**Table S7.** Total number of compounds that are significantly different between accessions. In bold are the number of compounds depicted that are significantly different after herbivory between two accessions, these numbers are given in italics for the JA-treated plants.

|       | An-1     | C-24     | Col-0    | Cvi      | Eri-1    | Kond     | Kyo-1    | Ler      | WS       |
|-------|----------|----------|----------|----------|----------|----------|----------|----------|----------|
| An-1  |          | <b>3</b> | <b>5</b> | <b>5</b> | <b>4</b> | <b>3</b> | <b>1</b> | <b>2</b> | <b>1</b> |
| C-24  | <i>0</i> |          | <b>2</b> | <b>5</b> | <b>1</b> | <b>6</b> | <b>3</b> | <b>3</b> | <b>4</b> |
| Col-0 | <i>1</i> | <i>3</i> |          | <b>4</b> | <b>2</b> | <b>5</b> | <b>2</b> | <b>1</b> | <b>4</b> |
| Cvi   | <i>4</i> | <i>0</i> | <i>3</i> |          | <b>2</b> | <b>2</b> | <b>3</b> | <b>1</b> | <b>4</b> |
| Eri-1 | <i>1</i> | <i>1</i> | <i>2</i> | <i>1</i> |          | <b>0</b> | <b>0</b> | <b>0</b> | <b>0</b> |
| Kond  | <i>2</i> | <i>2</i> | <i>4</i> | <i>4</i> | <i>3</i> |          | <b>0</b> | <b>1</b> | <b>2</b> |
| Kyo-1 | <i>2</i> | <i>2</i> | <i>0</i> | <i>4</i> | <i>1</i> | <i>2</i> |          | <b>1</b> | <b>0</b> |
| Ler   | <i>2</i> | <i>0</i> | <i>0</i> | <i>3</i> | <i>3</i> | <i>3</i> | <i>1</i> |          | <b>0</b> |
| WS    | <i>0</i> | <i>1</i> | <i>3</i> | <i>1</i> | <i>5</i> | <i>1</i> | <i>2</i> | <i>0</i> |          |
